# Supplementary material for: High-resolution inventory of technologies, activities, and emissions of coal-fired power plants in China from 1990 to 2010
Source: Copernicus journal article supplement (doi:10.5194/acp-15-13299-2015), 2015-12-01
Supplement: Supplementary file 1 [file acp-15-13299-2015-supplement.pdf]

Supplement of Atmos. Chem. Phys., 15, 13299–13317, 2015  
<http://www.atmos-chem-phys.net/15/13299/2015/>  
doi:10.5194/acp-15-13299-2015-supplement  
© Author(s) 2015. CC Attribution 3.0 License.

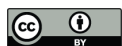

Atmospheric  
Chemistry  
and Physics  
Open Access  
EGU

*Supplement of*

## **High-resolution inventory of technologies, activities, and emissions of coal-fired power plants in China from 1990 to 2010**

**F. Liu et al.**

*Correspondence to:* Q. Zhang (qiangzhang@tsinghua.edu.cn)

The copyright of individual parts of the supplement might differ from the CC-BY 3.0 licence.

Table S1 Probability distributions of the national emission estimation-related parameters of coal-fired power plants in China

| Category                                        | Subcategory                                    | Value in 1990     | Distribution in 1990   | Value in 2010     | Distribution in 2010 | Rating <sup>a</sup> |
|-------------------------------------------------|------------------------------------------------|-------------------|------------------------|-------------------|----------------------|---------------------|
| Activity                                        | Coal Consumption (Tg)                          | 272               | Normal (CV: 10%)       | 1576              | Normal (CV: 5%)      | B                   |
| Boiler Type                                     | Pulverized Boiler Ratio                        | 79% (84%–74%)     | Triangular             | 82% (79%–84%)     | Triangular           | C                   |
|                                                 | Circulating Fluidized Bed Ratio                | NIP <sup>b</sup>  |                        | NIP <sup>b</sup>  |                      |                     |
|                                                 | Grate Furnace Ratio                            | 8% (3%–13%)       | Triangular             | 4% (2%–7%)        | Triangular           | C                   |
| Coal Type                                       | Bituminous Coal Ratio                          | 98% (88%–100%)    | Triangular             | 98% (93%–100%)    | Triangular           | C                   |
|                                                 | Anthracite Coal Ratio                          | NIP <sup>b</sup>  |                        | NIP <sup>b</sup>  |                      |                     |
| Unabated SO <sub>2</sub> Emission               | Sulfur Content of Coal (%)                     | 1.01              | Normal (CV: 20%)       | 0.95              | Normal (CV: 5%)      | C                   |
| Factor                                          | Sulfur Retention in Ash (%)                    | 15 (12–18)        | Beta                   | same <sup>c</sup> |                      | B                   |
| Unabated NO <sub>x</sub> Emission Factor (g/kg) | Large Units <sub>Advanced LNB_Bituminous</sub> | 4.06              | Logistic (Scale: 0.16) | same <sup>c</sup> |                      | A                   |
|                                                 | Large Units <sub>Advanced LNB_Anthracite</sub> | 6.50 (4.34–8.23)  | Triangular             | same <sup>c</sup> |                      | A                   |
|                                                 | Large Units <sub>LNB_Bituminous</sub>          | 5.08              | Logistic (Scale: 0.71) | same <sup>c</sup> |                      | A                   |
|                                                 | Large Units <sub>LNB_Anthracite</sub>          | 8.04              | Logistic (Scale: 1.29) | same <sup>c</sup> |                      | A                   |
|                                                 | Medium Units <sub>LNB_Bituminous</sub>         | 6.78              | Logistic (Scale: 0.32) | same <sup>c</sup> |                      | A                   |
|                                                 | Medium Units <sub>LNB_Anthracite</sub>         | 7.29 (6.58–7.88)  | Triangular             | same <sup>c</sup> |                      | A                   |
|                                                 | Medium Units <sub>Non-LNB_Bituminous</sub>     | 7.63 (3.59–12.17) | Triangular             | same <sup>c</sup> |                      | A                   |
|                                                 | Medium Units <sub>Non-LNB_Anthracite</sub>     | 10.46             | Logistic (Scale: 1.31) | same <sup>c</sup> |                      | A                   |
|                                                 | Small Units <sub>Non-LNB_Bituminous</sub>      | 6.66 (6.17–6.93)  | Triangular             | same <sup>c</sup> |                      | A                   |
| Small Units <sub>Non-LNB_Anthracite</sub>       | 10.50 (9.36–11.50)                             | Triangular        | same <sup>c</sup>      |                   | A                    |                     |

|                                                        |                                                |                  |                        |                   |                 |   |
|--------------------------------------------------------|------------------------------------------------|------------------|------------------------|-------------------|-----------------|---|
| Unabated<br>PM <sub>2.5</sub><br>Emission<br>Factor    | Ash Content of Coal (%)                        | 27.7             | Normal (CV: 20%)       | 25.90             | Normal (CV: 5%) | C |
|                                                        | $ar_{\text{Pulverized Boilers}}^d$             | 20% (13%–28%)    | Beta                   | same <sup>c</sup> |                 | B |
|                                                        | $ar_{\text{Circulating fluidized beds}}^d$     | 44% (40%–52%)    | Uniform                | same <sup>c</sup> |                 | B |
|                                                        | $ar_{\text{Grate furnaces}}^d$                 | 85%              | Logistic (Scale: 0.05) | same <sup>c</sup> |                 | B |
|                                                        | $f_{\text{Pulverized boilers}}^d$              | 6%               | Lognormal (GSD: 1.19%) | same <sup>c</sup> |                 | B |
|                                                        | $f_{\text{Circulating fluidized beds}}^d$      | 7% (5%–10%)      | Uniform                | same <sup>c</sup> |                 | B |
|                                                        | $f_{\text{Grate furnaces}}^d$                  | 14% (3%–25%)     | Uniform                | same <sup>c</sup> |                 | B |
| Unabated<br>PM <sub>2.5-10</sub><br>Emission<br>Factor | $f_{\text{Pulverized boilers}}^d$              | 17% (13%–19%)    | Beta                   | same <sup>c</sup> |                 | B |
|                                                        | $f_{\text{Circulating fluidized beds}}^d$      | 22% (21%–24%)    | Uniform                | same <sup>c</sup> |                 | B |
|                                                        | $f_{\text{Grate furnaces}}^d$                  | 23% (3%–23%)     | Uniform                | same <sup>c</sup> |                 | B |
| Unabated<br>CO <sub>2</sub><br>Emission<br>Factor      | Carbon Content <sub>Bituminous</sub> (kg-C/GJ) | 25.8             | Lognormal (GSD: 1.5%)  | same <sup>c</sup> |                 | B |
|                                                        | Carbon Content <sub>Anthracite</sub> (kg-C/GJ) | 26.7             | Lognormal (GSD: 1.5%)  | same <sup>c</sup> |                 | B |
|                                                        | Oxidization Rate                               | 100%             | Lognormal (GSD: 0.2%)  | same <sup>c</sup> |                 | B |
|                                                        | Heating Value (kJ/g-coal)                      | 20.1             | Normal (CV: 10%)       | 18.8              | Normal (CV: 5%) | C |
| Control<br>Technology<br>Penetration                   | FGD                                            | 0% (0%–5%)       | Triangular             | 1% (0%–3%)        | Triangular      | C |
|                                                        | FGD+Wet Scrubbers                              | 0% (0%–5%)       | Triangular             | 86% (83%–88%)     | Triangular      | C |
|                                                        | Non-LNB <sub>Large Units</sub>                 | NIP <sup>b</sup> |                        | –                 |                 |   |
|                                                        | LNB <sub>Large Units</sub>                     | 100% (90%–100%)  | Uniform                | 40% (30%–50%)     | Uniform         | C |
|                                                        | Advanced LNB <sub>Large Units</sub>            | –                |                        | NIP <sup>b</sup>  |                 |   |

|                    |                                                                   |                  |                  |                   |                 |   |
|--------------------|-------------------------------------------------------------------|------------------|------------------|-------------------|-----------------|---|
|                    | Non-LNB <sub>Medium Units</sub>                                   | 100% (90%–100%)  | Uniform          | 38% (28%–48%)     | Uniform         | C |
|                    | LNB <sub>Medium Units</sub>                                       | NIP <sup>b</sup> |                  | NIP <sup>b</sup>  |                 |   |
|                    | Non-LNB <sub>Small Units</sub>                                    | 100% (90%–100%)  | Uniform          | 100% (90%–100%)   | Uniform         | C |
|                    | LNB <sub>Small Units</sub>                                        | NIP <sup>b</sup> |                  | NIP <sup>b</sup>  |                 |   |
|                    | Cyclones <sub>Pulverized boilers</sub>                            | 5% (2%–7%)       | Uniform          | 0% (0%–1%)        | Uniform         | C |
|                    | Wet Scrubbers <sub>Pulverized boilers</sub>                       | 43% (41%–46%)    | Uniform          | 1% (0%–2%)        | Uniform         | C |
|                    | Electrostatic Precipitators <sub>Pulverized boilers</sub>         | NIP <sup>b</sup> |                  | NIP <sup>b</sup>  |                 |   |
|                    | Bag Filters <sub>Pulverized boilers</sub>                         | 2% (0%–5%)       | Uniform          | 3% (2%–4%)        | Uniform         | C |
|                    | Cyclones <sub>Circulating fluidized beds</sub>                    | 25% (22%–27%)    | Uniform          | 0% (0%–1%)        | Uniform         | C |
|                    | Wet Scrubbers <sub>Circulating fluidized beds</sub>               | 47% (44%–49%)    | Uniform          | 3% (2%–4%)        | Uniform         | C |
|                    | Electrostatic Precipitators <sub>Circulating fluidized beds</sub> | NIP <sup>b</sup> |                  | NIP <sup>b</sup>  |                 |   |
|                    | Bag Filters <sub>Circulating fluidized beds</sub>                 | 0% (0%–3%)       | Uniform          | 11% (10%–12%)     | Uniform         | C |
|                    | Cyclones <sub>Grate furnaces</sub>                                | 8% (6%–11%)      | Uniform          | 5% (4%–6%)        | Uniform         | C |
|                    | Wet Scrubbers <sub>Grate furnaces</sub>                           | 75% (72%–77%)    | Uniform          | 27% (26%–28%)     | Uniform         | C |
|                    | Electrostatic Precipitators <sub>Grate furnaces</sub>             | NIP <sup>b</sup> |                  | NIP <sup>b</sup>  |                 |   |
|                    | Bag Filters <sub>Grate furnaces</sub>                             | 0% (0%–3%)       | Uniform          | 3% (2%–4%)        | Uniform         | C |
| Removal Efficiency | Wet Scrubbers <sub>SO<sub>2</sub></sub>                           | 20%              | Normal (CV: 10%) | same <sup>c</sup> |                 | B |
|                    | FGD <sub>SO<sub>2</sub></sub>                                     | 78%              | Normal (CV: 10%) | 78%               | Normal (CV: 5%) | C |
|                    | Cyclones <sub>PM<sub>2.5</sub></sub>                              | 10% (5%–15%)     | Triangular       | same <sup>c</sup> |                 | B |

|                                                 |                         |                       |                   |   |
|-------------------------------------------------|-------------------------|-----------------------|-------------------|---|
| Wet Scrubbers <sub>PM2.5</sub>                  | 50% (38%–72%)           | Triangular            | same <sup>c</sup> | B |
| Electrostatic Precipitators <sub>PM2.5</sub>    | 93%                     | Lognormal (GSD: 1.0%) | same <sup>c</sup> | B |
| wet-FGD <sub>PM2.5</sub>                        | 50%                     | Normal (CV: 2.5%)     | same <sup>c</sup> | B |
| Bag Filters <sub>PM2.5</sub>                    | 99% (98.7%–<br>99.4%)   | Triangular            | same <sup>c</sup> | B |
| Cyclones <sub>PM2.5-10</sub>                    | 70% (65%–73%)           | Triangular            | same <sup>c</sup> | B |
| Wet Scrubbers <sub>PM2.5-10</sub>               | 90% (83%–95%)           | Triangular            | same <sup>c</sup> | B |
| Electrostatic Precipitators <sub>PM2.5-10</sub> | 98%                     | Lognormal (GSD: 1.0%) | same <sup>c</sup> | B |
| wet-FGD <sub>PM2.5-10</sub>                     | 90%                     | Normal (CV: 2.8%)     | same <sup>c</sup> | B |
| Bag Filters <sub>PM2.5-10</sub>                 | 99.5% (99.3%–<br>99.7%) | Triangular            | same <sup>c</sup> | B |

<sup>a</sup>A: the distribution is obtained via data fitting based on field measurements / CPED; B: the distribution is determined from extant studies; C: the distribution is subjectively provided.

<sup>b</sup>Non-independent parameter, calculated as 1 minus the penetrations of other boiler types / coal types / control technologies.

<sup>c</sup>The distribution is the same as that in 1990.

<sup>d</sup>*ar*: the mass fraction of retention ash; *f*: the mass fraction of PM<sub>2.5</sub>/ PM<sub>10</sub> to the total particulate matter in fly ash.

Table S2 Probability distributions of emission estimation-related parameters for a large coal-fired generation unit in China<sup>a</sup>

| Category           | Subcategory                                     | Value in 2000    | Distribution in 2000 <sup>b</sup> | Value in 2010    | Distribution in 2010 <sup>b</sup> |
|--------------------|-------------------------------------------------|------------------|-----------------------------------|------------------|-----------------------------------|
| Activity           | Coal Consumption Rate (gce/kW·h <sup>-1</sup> ) | 328              | Normal (CV: 10%)                  | 328              | Normal (CV: 5%)                   |
|                    | Annual Operation Hours (hours)                  | 4118             | Normal (CV: 20%)                  | 4699             | Normal (CV: 5%)                   |
| Coal Quality       | Probability of Bituminous Coal                  | 95%              | Yes-No                            | 99%              | Yes-No                            |
|                    | Probability of Anthracite Coal                  | NIP <sup>c</sup> |                                   | NIP <sup>c</sup> |                                   |
|                    | Ash Content of Coal (%)                         | 25.1             | Normal (CV: 10%)                  | 25.1             | Normal (CV: 5%)                   |
|                    | Heating Value (kJ/g-coal)                       | 21.5             | Normal (CV: 10%)                  | 19.3             | Normal (CV: 5%)                   |
|                    | Sulfur Content of Coal (%)                      | 1.13             | Normal (CV: 10%)                  | 0.98             | Normal (CV: 5%)                   |
| Control Technology | FGD                                             | 50%              | Yes-No                            | 99%              | Yes-No                            |
|                    | Removal Efficiency of FGD on SO <sub>2</sub>    | 42% (0%–84%)     | Triangular                        | 84% (81%–86%)    | Triangular                        |
|                    | LNB                                             | 50%              | Yes-No                            | 50%              | Yes-No                            |

<sup>a</sup>The selected unit is a 600 MW, pulverized boiler, equipped with FGD, LNB, and an electrostatic precipitator. The uncertainties of the unlisted emission-related parameters are the same as those given in Table S1.

<sup>b</sup>The distribution is subjectively provided.

<sup>c</sup>Non-independent parameter, calculated as 1 minus the ratio of bituminous coal.

Table S3 Provincial coal consumption rate, heating value, sulfur content and ash content in 2010.

| Province       | Coal Consumption Rate | Heating Value           | Sulfur Content | Ash Content |
|----------------|-----------------------|-------------------------|----------------|-------------|
|                | gce kWh <sup>-1</sup> | kJ g-coal <sup>-1</sup> | %              | %           |
| Beijing        | 319.7                 | 20.0                    | 0.56           | 20.6        |
| Tianjin        | 311.9                 | 19.5                    | 0.76           | 24.3        |
| Hebei          | 326.9                 | 18.3                    | 1.02           | 27.7        |
| Shanxi         | 344.4                 | 17.7                    | 1.10           | 30.2        |
| Inner Mongolia | 367.0                 | 19.7                    | 0.79           | 22.8        |
| Liaoning       | 369.4                 | 19.0                    | 0.64           | 25.1        |
| Jilin          | 394.4                 | 18.6                    | 0.38           | 25.6        |
| Heilongjiang   | 377.5                 | 17.4                    | 0.33           | 29.9        |
| Shanghai       | 314.5                 | 21.9                    | 0.59           | 15.7        |
| Jiangsu        | 323.4                 | 20.3                    | 0.79           | 20.8        |
| Zhejiang       | 312.0                 | 21.8                    | 0.76           | 17.1        |
| Anhui          | 323.0                 | 16.5                    | 0.48           | 31.9        |
| Fujian         | 317.6                 | 21.2                    | 0.65           | 16.9        |
| Jiangxi        | 319.4                 | 18.4                    | 1.13           | 27.7        |
| Shandong       | 320.3                 | 18.5                    | 1.09           | 27.3        |
| Henan          | 320.6                 | 17.1                    | 0.77           | 32.4        |
| Hubei          | 328.6                 | 16.1                    | 1.27           | 34.7        |
| Hunan          | 322.6                 | 16.4                    | 1.10           | 35.4        |
| Guangdong      | 343.8                 | 21.2                    | 0.69           | 17.7        |
| Guangxi        | 329.0                 | 18.1                    | 1.88           | 29.0        |
| Hainan         | 317.2                 | 22.5                    | 1.08           | 15.8        |
| Chongqing      | 367.2                 | 16.7                    | 3.04           | 34.3        |
| Sichuan        | 391.0                 | 17.0                    | 1.67           | 34.0        |
| Guizhou        | 343.2                 | 16.4                    | 2.43           | 35.2        |
| Yunnan         | 359.2                 | 17.5                    | 1.23           | 30.2        |
| Tibet          | -                     | -                       | -              | -           |
| Shaanxi        | 329.5                 | 19.3                    | 1.29           | 24.4        |
| Gansu          | 312.3                 | 19.7                    | 0.73           | 22.3        |
| Qinghai        | 358.0                 | 20.5                    | 0.80           | 22.3        |
| Ningxia        | 347.5                 | 17.8                    | 1.07           | 28.8        |
| Xinjiang       | 338.7                 | 22.0                    | 0.58           | 17.4        |

## Comparison with satellite observations

Here we validated the NO<sub>x</sub> emission trends of two isolated power plants in CPED by comparing with trends in NO<sub>2</sub> columns derived from OMI. We use the OMI standard tropospheric NO<sub>2</sub> column data product (version 2.1, collection 3), which is available from the NASA Goddard Earth Science Data and Information Services Center ([http://disc.sci.gsfc.nasa.gov/Aura/data-holdings/OMI/omno2\\_v003.shtml](http://disc.sci.gsfc.nasa.gov/Aura/data-holdings/OMI/omno2_v003.shtml)). OMI is a UV-VIS nadir-viewing satellite spectrometer (Levelt et al., 2006) on board the Aura satellite (Celarier et al., 2008). NO<sub>2</sub> columns are derived from radiance measurements, using the Differential Optical Absorption Spectroscopy (DOAS) algorithm (Platt, 1994). OMI detects radiance spectra by 60 across-track pixels with ground pixel sizes ranging from 13×24 km<sup>2</sup> at nadir to about 13×150 km<sup>2</sup> at the outermost swath angle (57°). The 10 outermost pixels on both sides of the swath are excluded in this study to limit the across-track pixel width <40 km. From June 2007, OMI has shown severe spurious stripes, known as row anomalies that are likely caused by an obstruction in part of OMI's aperture (<http://www.knmi.nl/omi/research/product/rowanomaly-background.php>). The affected pixels are also excluded from the analysis. Only mostly cloud free observations (effective cloud fraction <30%) are considered in this study. For the purpose of plant-level study, we also binned OMI measurements to a 0.1°×0.1° grid by performing an area-weighted averaging.

Two large isolated power plants were compared, the Tuoketuo Power Plant located in Inner Mongolia with a total capacity of 5400 MW and the Yangcheng Power Plant located in Shanxi province with a total capacity of 3300 MW. We inspected satellite imagery from Google Earth to ensure the power plants are isolated and not interfered by other anthropogenic sources. We chose circular regions around each power plant with radii of 20 km, which is large enough to capture NO<sub>2</sub> plumes from each plant, to calculate yearly averages of OMI NO<sub>2</sub> column densities. Figure S1 compares the rates of change in NO<sub>x</sub> emissions from two power plants and OMI NO<sub>2</sub> columns during 2005–2010. Good agreement between NO<sub>2</sub> column trend and NO<sub>x</sub> emission trend were found, indicating the reasonable accuracy of emission trend estimates in CPED.



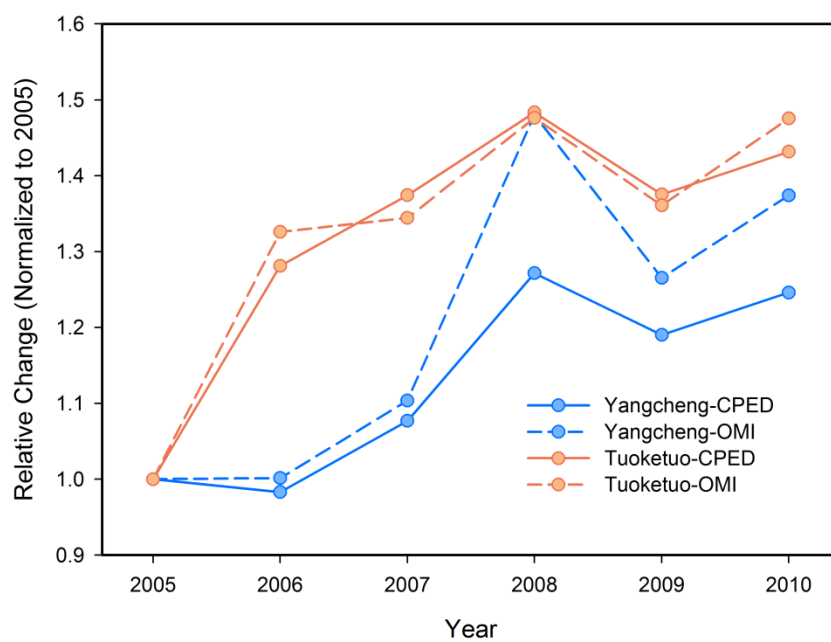

Figure S1. Relative changes of NO<sub>x</sub> emissions from two isolated power plants and collocated OMI NO<sub>2</sub> columns during 2005–2010.
